# Supplementary material
Source: Springer Nature journal article supplement (https://www.springerprofessional.de/resource/supplementary/40095_2012_54_MOESM6_ESM.pdf/11899712)

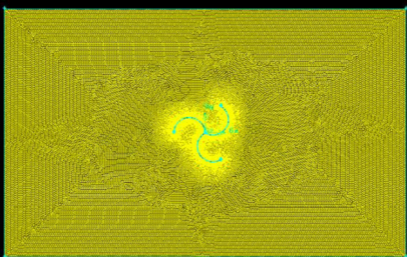

Model 1

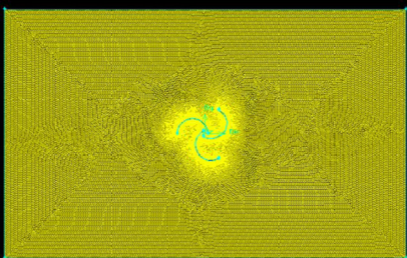

Model 2

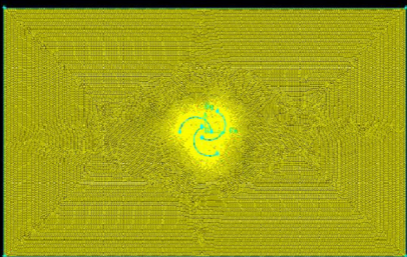

Model 3

Supplement: MOESM6 [file 11899712]
